# Supplementary material for: Clinicopathologic characteristics and prognostic factors for primary spinal epidural lymphoma: report on 36 Chinese patients and review of the literature
Source: BMC Cancer. 2017 Feb 14;17:131. doi: 10.1186/s12885-017-3093-z (PMC5309972; doi:10.1186/s12885-017-3093-z)
Supplement: Additional file 1: Table S1. — The clinical and pathologic features of Primary spinal epidural lymphomas cases examined in China. (XLSX 13 kb) [file 12885_2017_3093_MOESM1_ESM.xlsx]

## Sheet: Sheet3
Table S1. The clinical and pathologic features of Primary spinal epidural lymphomas cases examined in china.
Case	Age range	Interval (Onset-dyiagnosis)	Pathology	Stage	LCA	CD3	CD20	CD45	CD79	Range	Therapy	Recurrence		Follow-up (month)
number												Interval	Site
China Case 1	20~30	3mo	B cell lymphoma	/	(+)	/	/	/	/	L5-S2	S+CT	ND	ND	/
China Case 2	10~20	11mo	B cell lymphoma	IVb	/	(+)	(-)	/	(+)	L5	S+CT	8mo	L3	Alive with tumor 11
China Case 3	10~20	4mo	T cell lymphoma	IEa	(+)	/	(-)	/	/	L4-S2	S+CT	ND	ND	/
China Case 4	/	/	/	/	/	/	/	/	/	/	/	ND	ND	/
China Case 5	40~50	3mo	B cell lymphoma	IVa	/	/	(+)	/	(+)	L3-S2	S+CT+RT（18GY）	ND	ND	tumor-free 36
China Case 6	40~50	4mo	B cell lymphoma	/	/	/	(+)	(-)	/	S2	S	ND	ND	Died
China Case 7	50~60	7mo	T cell lymphoma	IE	/	(+)	/	(+)	/	C5-T3	CT	ND	ND	Died at 12
China Case 8	20~30	5mo	B cell lymphoma	IEa	(+)	(-)	(-)	(-)	(+)	T8-9	RT（40GY）	3mo	Leucocythemia	Alive with tumor 37
China Case 9	20~30	/	/	/	/	/	/	/	/	C4-C7	S	ND	ND	/
China Case 10	/	7mo	B cell lymphoma	/	(+)	/	(+)	/	/	S1-S3	S	ND	ND	/
China Case 11	50~60	1wk	B cell lymphoma	IE	/	/	/	/	/	T6-T7/L5	S+CT	ND	ND	tumor-free 18
China Case 12	0~10	1mo	B cell lymphoma	IE	(+)	/	(+)	(-)	/	T10-L1	S	ND	ND	/
China Case 13	40~50	5dy	B cell lymphoma	/	/	(-)	(+)	(-)	(+)	T4-T5	S+CT	ND	ND	/
China Case 14	50~60	3mo	B cell lymphoma	Ⅳ	/	(+)	(+)	(+)	(+)	T5-T7	S+CT+RT	ND	ND	tumor-free 30
China Case 15	60~70	2mo	B cell lymphoma	IE	(+)	/	(+)	/	/	L1-L4	S	ND	ND	tumor-free 6
China Case 16	20~30	2mo	T cell lymphoma	IE	(+)	/	(-)	(+)	/	C5-T4	S+CT	ND	ND	tumor-free 10
China Case 17	20~30	5mo	/	/	(+)	/	/	/	/	T10-L5	S	ND	ND	/
China Case 18	40~50	12mo	B cell lymphoma	IE	/	/	(-)	/	(+)	T10-T12	S+CT+RT（39.6GY）	8mo	Inguinal	Alive with tumor 12
China Case 19	0~10	3dy	Burkitt’s lymphoma	IE	/	(-)	(+)	/	/	T2-T6	S+CT	ND	ND	tumor-free 12
China Case 20	40~50	2mo	T cell lymphoma	/	(+)	(+)	/	/	/	T4-T6	S+CT	ND	ND	/
China Case 21	50~60	2mo	B cell lymphoma	IE	/	/	/	/	/	T9	S	ND	ND	/
China Case 22	20~!30	4mo	B cell lymphoma	/	(+)	/	/	/	/	L5-S2	S	ND	ND	/
China Case 23	20~30	15dy	B cell lymphoma	/	(+)	/	/	/	/	T6-8	S+CT	ND	ND	/
China Case 24	10~20	20dy	B cell lymphoma	/	(+)	/	(+)	(-)	/	T9-T11	S	ND	ND	tumor-free 48
China Case 25	20~30	12mo	B cell lymphoma	/	(+)	(-)	(+)	/	/	L2-3	S+RT（44GY）	ND	ND	tumor-free 48
China Case 26	20~30	3dy	B cell lymphoma	/	/	(-)	(+)	(-)	(+)	T2-T4	S+CT+RT（36GY）	ND	ND	/
China Case 27	20~30	4mo	B cell lymphoma	/	(+)	(-)	(+)	/	/	L5	S	ND	ND	/
China Case 28	30~40	3mo	T cell lymphoma	IEa	/	/	/	/	/	T4	S	ND	ND	/
China Case 29	10~20	2wk	/	/	(+)	(+)/(-)	/	/	/	L3-S3	S+CT	ND	ND	/
China Case 30	20~30	40dy	B cell lymphoma	IE	/	/	/	/	/	C5-T1	S	ND	ND	Died at 0.5
China Case 31	50~60	12mo	B cell lymphoma	/	/	/	/	/	/	L4-S1	S	ND	ND	/
China Case 32	20~30	3mo	T cell lymphoma	ⅡE	/	(+)	(+)	/	/	T6-T8	S+CT	ND	ND	tumor-free 4
China Case 33	20~30	2mo	B cell lymphoma	/	(+)	/	(+)	/	/	T6-T9	S	ND	ND	/
China Case 34	10~20	2mo	B cell lymphoma	/	(+)	/	(+)	/	/	L1-L3	S+CT	ND	ND	/
China Case 35	50~60	/	B cell lymphoma	/	(+)	/	/	/	/	T8-T10	S	ND	ND	/
China Case 36	30~40	3mo	B cell lymphoma	IE	/	/	/	/	/	T1-T3	S+CT+RT	ND	ND	tumor-free 5
S, surgery; CT, chemotherapy; RT, radiotherapy; M, male; F, female.
